# Supplementary material for: A recombinant chimeric protein specifically induces mutant KRAS degradation and potently inhibits pancreatic tumor growth
Source: PubMed Central journal article supplement (PMC5190097; doi:10.18632/oncotarget.9996), 2016-06-14
Supplement: oncotarget-07-44299-s001.pdf [file oncotarget-07-44299-s001.pdf]

## A recombinant chimeric protein specifically induces mutant KRAS degradation and potently inhibits pancreatic tumor growth

### Supplementary Materials

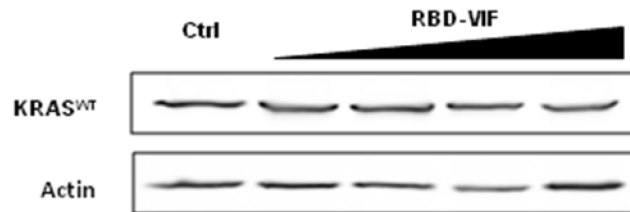

**Supplementary Figure S1: Chimeric proteins RBD-VIF has no effect on the degradation of wild-type KRAS.** The wild-type KRAS plasmids were co-transfected with different doses of RBD-VIF plasmids into HEK293T cells, and the levels of KRAS were determined by western blotting after 48 h.

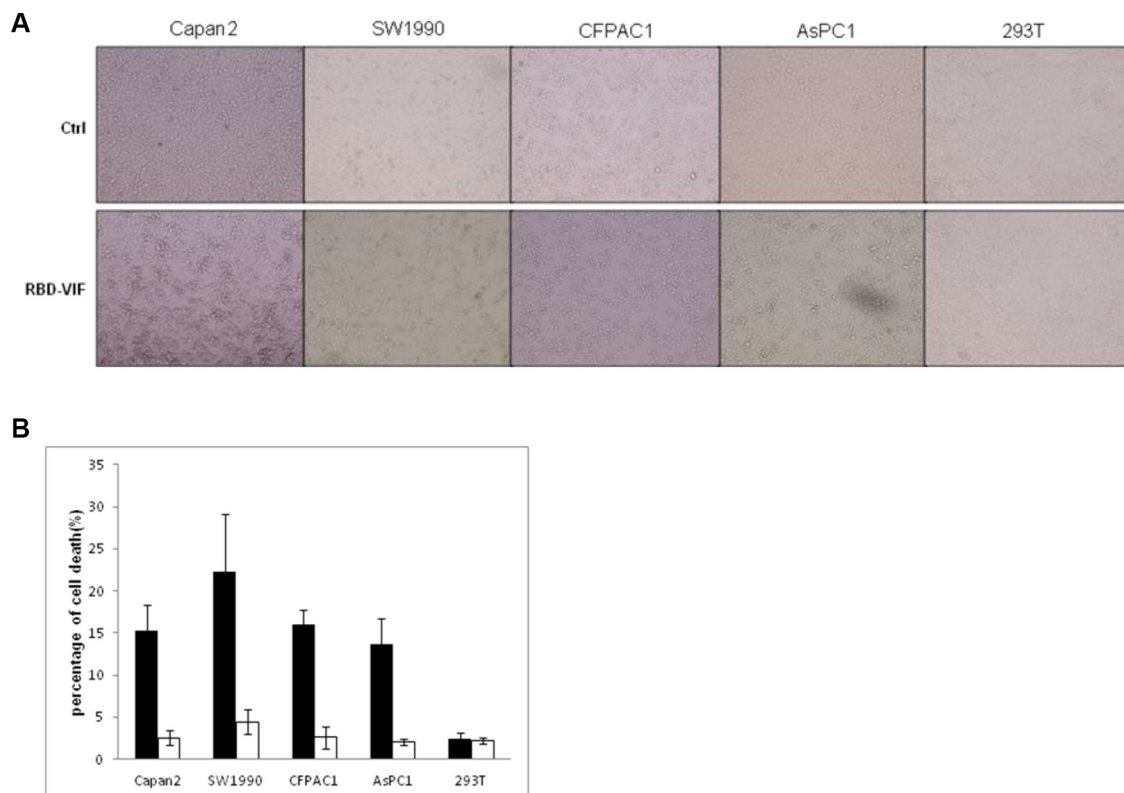

**Supplementary Figure S2: Recombinant chimeric proteins induce cell death in many different mutant KRAS-expressing tumor cell lines.** (A) The purified protein RBD-VIF was added to different cell cultures. After 48 h, cells were examined under microscope. (B) The percentage of cell death was evaluated by MTT assay, and mean  $\pm$  SEM is shown. Error bars indicate SEM.
